# Supplementary material for: Europium doping promoted intermolecular charge transfer in UiO-67-CDC for ultrasensitive turn-on colorimetric detection of an anthrax biomarker
Source: Royal Society of Chemistry journal article supplement (doi:10.1039/d4ce00940a), 2024-01-01
Supplement: d4ce00940a1.pdf [file d4ce00940a1.pdf]

## Supplementary Information

### Europium doping promoted intermolecular charge transfer in UiO-67-CDC for ultrasensitive turn-on colorimetric detection of an anthrax biomarker

Ming-Cheng Liu,<sup>a</sup> Jia-Qi Du,<sup>a</sup> Qian Sun,<sup>\*a</sup> and En-qing Gao<sup>b</sup>

<sup>a</sup> Department of Chemistry, School of Chemistry and Molecular Engineering, East China Normal University, Shanghai 200241, P. R. China

<sup>b</sup> Shanghai Key Laboratory of Green Chemistry and Chemical Processes, School of Chemistry and Molecular Engineering, East China Normal University, Shanghai 200062, P. R. China.

#### Table of contents

S1 Experiment (The synthesis of UiO-67-CDC)

S2 Material characterization(IR,TGA)

S3 Fluorescence spectra of Eu@UiO-67-CDC in different solvents

S4 Standard addition recovery experiment(river water, lake water)

S5 Circulation and stability of Eu@UiO-67-CDC

S6 The fluorescence excitation/emission spectrum of the Eu@UiO-67-CDC and UV-visible absorption spectrum of DPA

S7 XRD of MOF before and after the addition of analytes

S8 Energy level orbital diagram of DPA and ligand

S9 Relevant calculation table

---

## 1. Experiment

### 1.1 Materials and instruments

All reagents used in this study are commercially available and have not undergone post-processing. Zirconium tetrachloride (STREM) and Phloxine B (Macklin) are common reagents. The ligand 9H-carbazole-2,7-dicarboxylic acid (9H-2,7-CDC) was synthesized according to the literature reported by Adam W. Freeman. UV-vis spectra of analytes and Eu@MOF composites were obtained using a GENESYS 10S spectrophotometer with a 200-800 nm scan range. Powder X-ray diffraction patterns (PXRD) were measured using a Bruker D8-ADVANCE diffractometer with Cu-K $\alpha$  radiation. Fluorescence spectra were obtained using an FL980 (Edinburgh) fluorescence spectrophotometer ( $\lambda_{\text{ex}} = 320$  nm).  $^1\text{H}$  NMR was collected using a Bruker BioSpin GmbH instrument with DMSO-d $_6$  as the deuterated reagent. Infrared spectra were collected using a Nicolet NEXUS 670, ranging from 400  $\text{cm}^{-1}$  to 4000  $\text{cm}^{-1}$ . Thermogravimetric analysis (TGA) was performed using a Mettler Toledo TGA/SDTA851 e/5FL1100, and Brunauer-Emmett-Teller adsorption and desorption were implemented using Autosorb-IQ.

### 1.2 Synthesis of UiO-67-CDC

UiO-67-CDC was synthesized using a conventional solvothermal method. 72.8 mg of  $\text{ZrCl}_4$  and 79.6 mg of  $\text{H}_2\text{CDC}$  were mixed uniformly with 6.0 mL of DMF. After adding 0.54 mL of glacial acetic acid, the mixture was sonicated for 30 minutes and then sealed in the lining of a stainless steel autoclave. The mixture was heated at 80  $^\circ\text{C}$  for 24 hours. After cooling to room temperature, it was filtered and washed with ethanol three times. The resulting product was dried in a vacuum oven at 60  $^\circ\text{C}$  for 6 hours, yielding 113 mg of a light yellow powder<sup>1</sup>.

## 2. Material characterization

### 2.1 FT-IR spectra

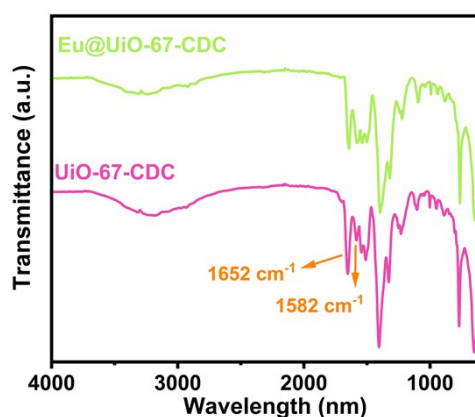

Figure S1 FT-IR spectra of UiO-67-CDC, Eu@UiO-67-CDC.

## 2.2 Thermogravimetric analysis

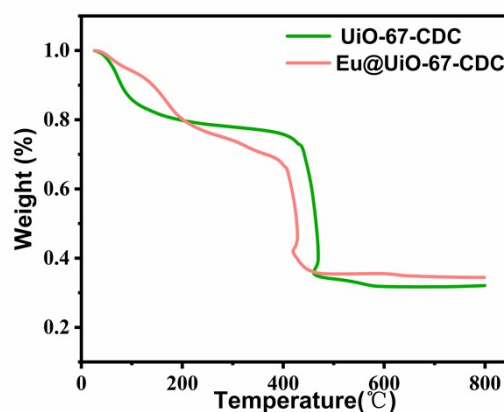

Figure S2 Thermogravimetric analysis of UiO-67-CDC, Eu@UiO-67-CDC.

## 3. Fluorescence spectra of Eu@UiO-67-CDC in different solvents

Before the experiment, Eu@UiO-67-CDC was immersed in four solvents, methanol, ethanol, DMF, and acetonitrile, to investigate the optimal solvent. The results showed that in DMF solvent, Eu@UiO-67-CDC exhibited significantly higher characteristic peak fluorescence intensity due to DMF's further adequate sensitization of  $\text{Eu}^{3+}$ . The fluorescence intensity was much higher than the intrinsic luminescence intensity of the MOF, resulting in a robust red color under UV light, which is not conducive to subsequent detection of DPA. As the most common organic solvent, ethanol was suitable for Eu@UiO-67-CDC, as it exhibited a moderate dual-emission fluorescence intensity. Therefore, subsequent tests were conducted in an ethanol system.

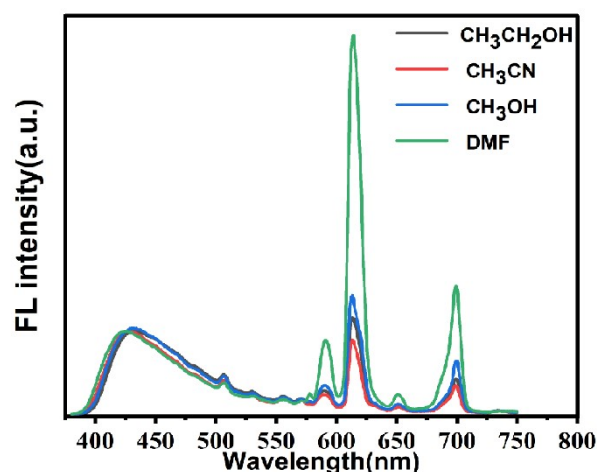

Figure S3 Fluorescence emission spectra of Eu@UiO-67-CDC in different organic solvents.

#### 4. Standard addition recovery experiment (river water, lake water)

The practical application of Eu@UiO-67-CDC was evaluated using river water and lake water samples. After adding a known concentration of DPA (theoretical value) to the actual water sample and detecting the DPA concentration using fluorescence detection with the sensor, the spiked recovery rate can be calculated as follows: spiked recovery rate = (measured value - blank value) / theoretical value. Table S1 shows no DPA was detected in the blank river and lake water samples. The recovery rate of DPA in the actual water samples ranged from 97.43% to 102.37%, with an RSD (n=3) of less than 1.40%. These results indicate that Eu@UiO-67-CDC has good potential for detecting DPA in actual water samples.

Table S1 The Eu@UiO-67-CDC sensor system was used to determine DPA's spiked recovery in lake and river water.

| Samples     | Added<br>( $\mu\text{M}$ ) | Fluorescence method     |              |                |
|-------------|----------------------------|-------------------------|--------------|----------------|
|             |                            | Found ( $\mu\text{M}$ ) | Recovery (%) | RSDs (%) (n=3) |
| River water | 0                          | -                       | -            | -              |
|             | 10                         | 9.98                    | 99.82        | 1.15           |
|             | 30                         | 30.19                   | 100.62       | 1.05           |
|             | 50                         | 50.91                   | 101.82       | 1.24           |
| Lake water  | 0                          | -                       | -            | -              |

|  |    |       |        |      |
|--|----|-------|--------|------|
|  | 10 | 9.74  | 97.43  | 0.92 |
|  | 30 | 30.29 | 100.97 | 0.98 |
|  | 50 | 51.19 | 102.37 | 1.40 |

## 5. Circulation and stability of Eu@UiO-67-CDC

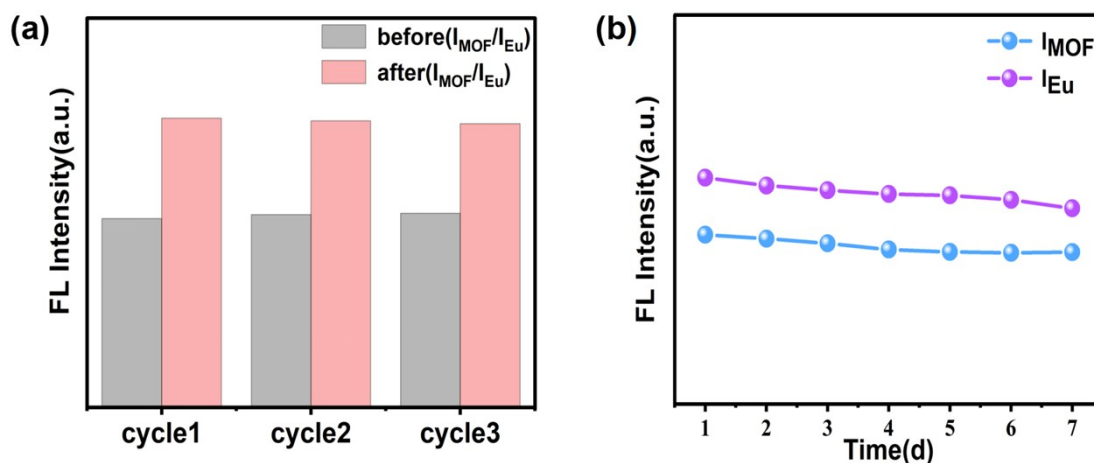

Figure S4 (a) The cyclic experiment diagram of Eu@UiO-67-CDC, (b) the fluorescence intensity diagram of dual emission peaks of Eu@UiO-67-CDC within 7 days.

## 6. The fluorescence excitation/emission spectrum of the Eu@UiO-67-CDC and UV-visible absorption spectrum of DPA

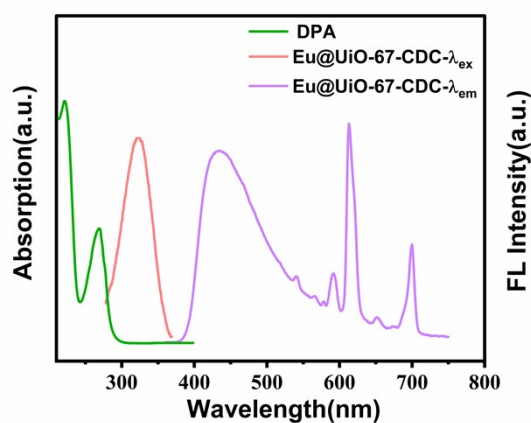

Figure S5 The fluorescence excitation/emission spectrum of the Eu@UiO-67-CDC and UV-visible absorption spectrum of DPA.

## 7. XRD of MOF before and after the addition of analytes

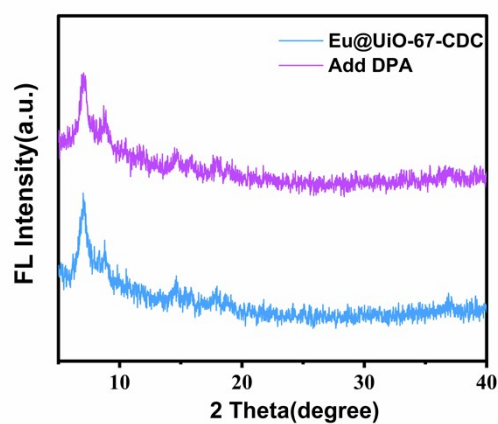

Figure S6 The PXRD patterns of Eu@UiO-67-CDC before and after the addition of DPA.

## 8. Energy level orbital diagram of DPA and ligand

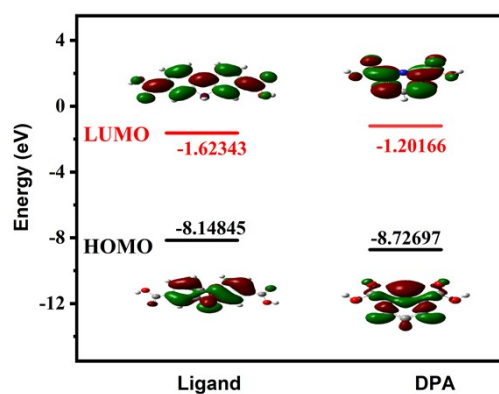

Figure S7 Energy level orbital diagram of the ligand and DPA.

## 9. Relevant calculation table

Table S2 The molecular size of DPA and  $[\text{Eu}(\text{NO}_3)_3(\text{H}_2\text{O})_4] \cdot 2\text{H}_2\text{O}$ .

| Sample                                                                       | Size (wt%) <sup>a</sup> |       |        |
|------------------------------------------------------------------------------|-------------------------|-------|--------|
|                                                                              | a                       | b     | c      |
| DPA                                                                          | 11.210                  | 7.952 | 3.422  |
| $[\text{Eu}(\text{NO}_3)_3(\text{H}_2\text{O})_4] \cdot 2\text{H}_2\text{O}$ | 6.705                   | 9.140 | 11.647 |

Table S3 The LUMO and HOMO of the ligands  $\text{CDC}^{2-}$  and DPA.

| Sample    | DPA      | $\text{CDC}^{2-}$ |
|-----------|----------|-------------------|
| LUMO (eV) | -1.20166 | -1.62343          |

|                               |          |          |
|-------------------------------|----------|----------|
| HOMO (eV)                     | -8.72697 | -8.14845 |
| HOMO-LUMO energy band gap(eV) | 7.52531  | 6.52502  |

Table S4 The  $S_0$ ,  $S_1$ , and  $T_1$  energy levels of DPA.

|                            | Energies    | Unit             |
|----------------------------|-------------|------------------|
| Excited states $S_1$       | -625.05459  | Hartree          |
| Ground state $S_0$         | -625.19217  | Hartree          |
| Triple excited state $T_1$ | -625.07695  | Hartree          |
| $S_1-S_0$                  | 30194.87993 | $\text{cm}^{-1}$ |
| $T_1-S_0$                  | 25285.70474 | $\text{cm}^{-1}$ |

Table S5 The  $S_0$ ,  $S_1$ , and  $T_1$  energy levels of CDC<sup>2-</sup>.

|                            | Energies    | Unit             |
|----------------------------|-------------|------------------|
| Excited states $S_1$       | -894.23846  | Hartree          |
| Ground state $S_0$         | -894.36123  | Hartree          |
| Triple excited state $T_1$ | -894.26427  | Hartree          |
| $S_1-S_0$                  | 26945.84218 | $\text{cm}^{-1}$ |
| $T_1-S_0$                  | 21281.21559 | $\text{cm}^{-1}$ |

- 
1. A. Das and S. Biswas, *Sensors and Actuators B: Chemical*, 2017, **250**, 121-131.
